# Supplementary material
Source: publisher figshare collection journal article supplement (https://acs.figshare.com/ndownloader/files/3802645)
Supplement: Supplementary file 1 [file 3802645]

# Photoinduced Birefringence in PMMA Polymer Doped with Photoisomerisable Pyrazoline Derivative

*Adam Szukalski,<sup>†</sup> Karolina Haupa,<sup>††</sup> Andrzej Miniewicz<sup>†</sup> and Jaroslaw Mysliwiec<sup>†,\*</sup>*

<sup>†</sup> Faculty of Chemistry, Advanced Materials Engineering and Modelling Group, Wrocław  
University of Technology, Wybrzeże Wyspiańskiego 27, 50-370 Wrocław

<sup>††</sup> Chemistry Department, University of Wrocław, F. Joliot-Curie 14, 50-383 Wrocław

## SUPPORTING INFORMATION

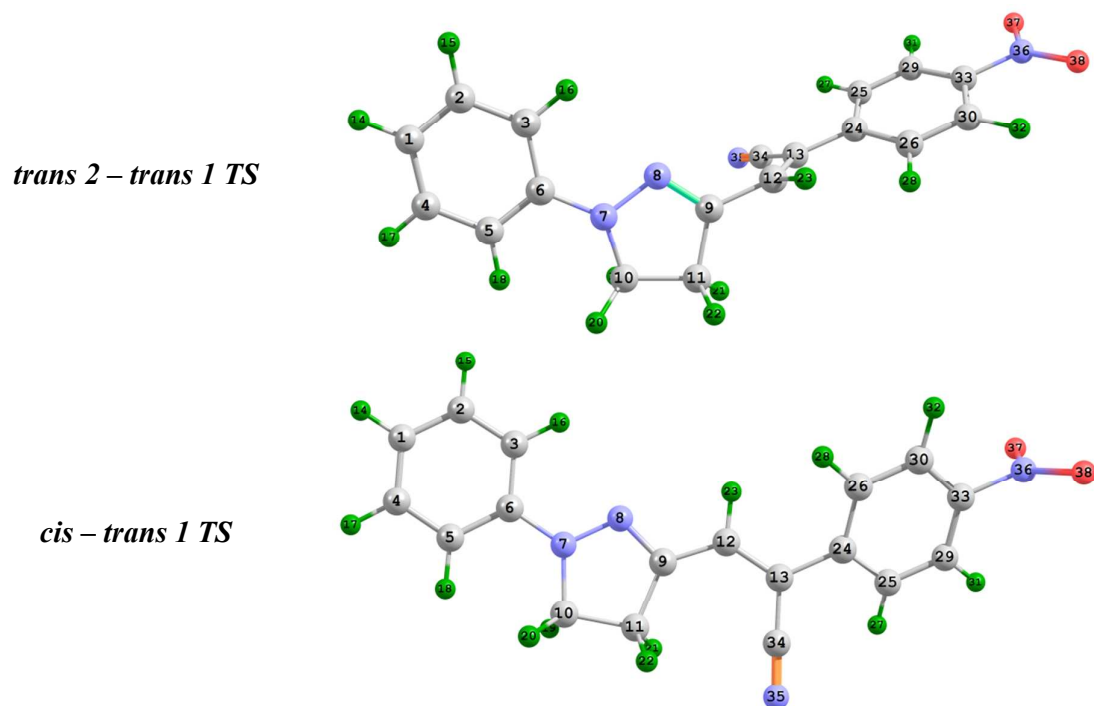

**Figure S1.** Optimized molecular structures of transition states between *trans 2* - *trans 1* and *cis* - *trans 1* conformers of PY-oCNNO<sub>2</sub>; DFT/B3LYP/6-311++G(d,p). Atom colors: C – gray, H – green, N – blue, O - red.
